# Supplementary material for: Multi-scale approaches for high-speed imaging and analysis of large neural populations
Source: PubMed Central journal article supplement (PMC5557609; doi:10.1371/journal.pcbi.1005685), 2017-08-03

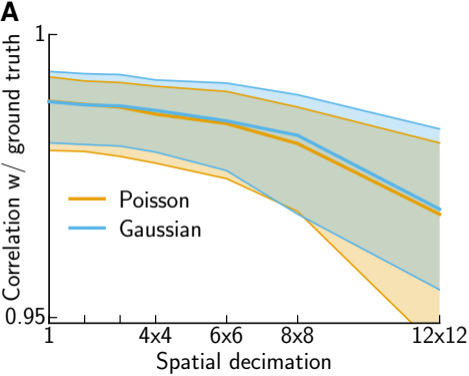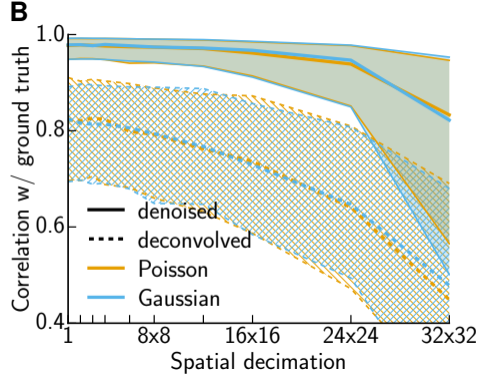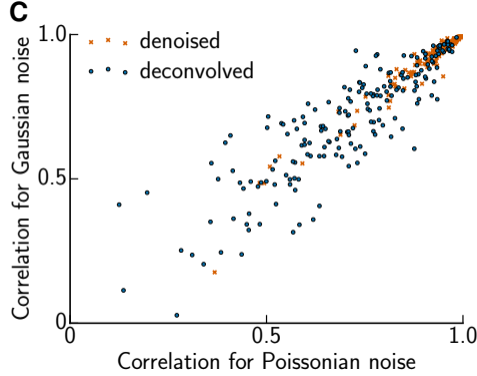

Supplement: pcbi.1005685.s002.pdf [file pcbi.1005685.s002.pdf]
